# Supplementary material for: Modulations of human resting brain connectivity by kisspeptin enhance sexual and emotional functions
Source: PubMed Central journal article supplement (PMC6237465; doi:10.1172/jci.insight.121958), 2018-10-18
Supplement: jciinsight-3-121958-s034.pdf [file jciinsight-3-121958-s034.pdf]

**Supplemental Figure 1.** Group mean spatial maps. Group mean for all participants ( $n=29$ ) for both visits (kisspeptin and vehicle) for the following seed-based resting state networks: (A) Default mode (DMN), (B) Executive control (ECN), (C) Salience (SAL), (D) Amygdala, (E) Hippocampus, (F) Anterior cingulate, (G) Putamen, (H) Globus pallidus, (I) Thalamus. All analyses performed using cluster-based thresholding ( $Z = 2.3$ ,  $P < 0.05$ ) for the purposes of inference. Spatial maps thresholded at  $Z = 4$  here for the purposes of clarity of display.

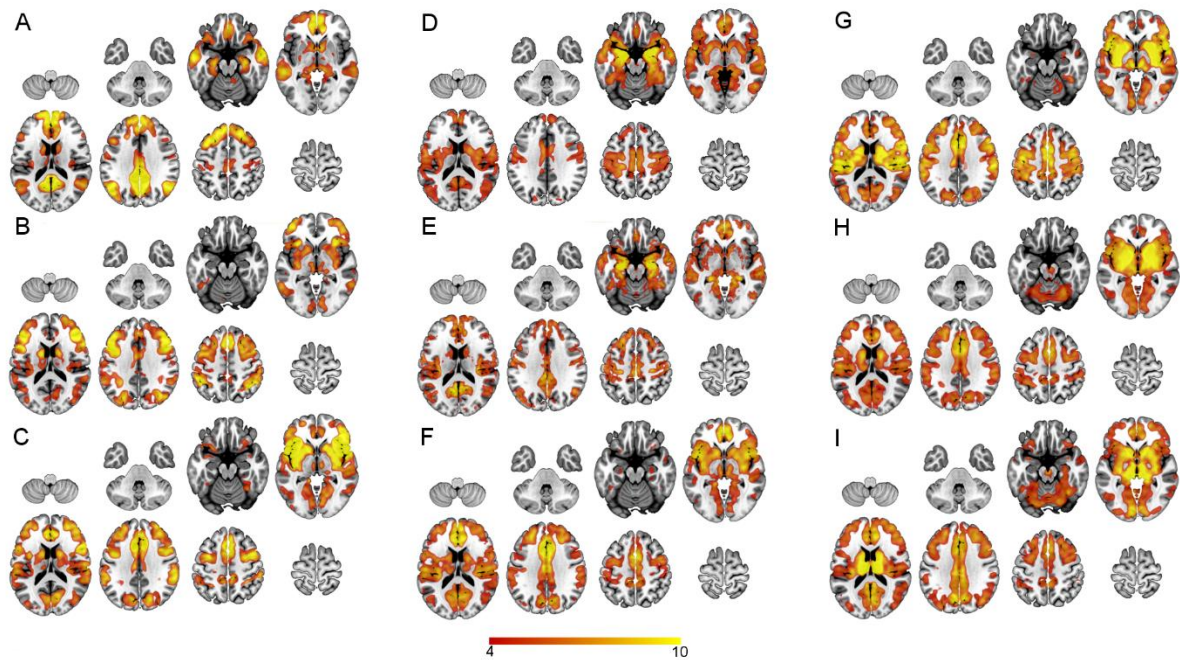

**Supplemental Figure 2.** Overlap between seed-based and Neurosynth networks. Group mean spatial maps for all participants ( $n=29$ ) for both visits (kisspeptin and vehicle) using seed-based analysis (in blue) overlaid on the respective networks from Neurosynth meta-analysis tool (<http://www.neurosynth.org/>; in red-yellow) for (A) Default mode (DMN), (B) Executive control (ECN) and (C) Salience (SAL). Spatial maps are thresholded for clarity of display ( $Z = 2$ ).

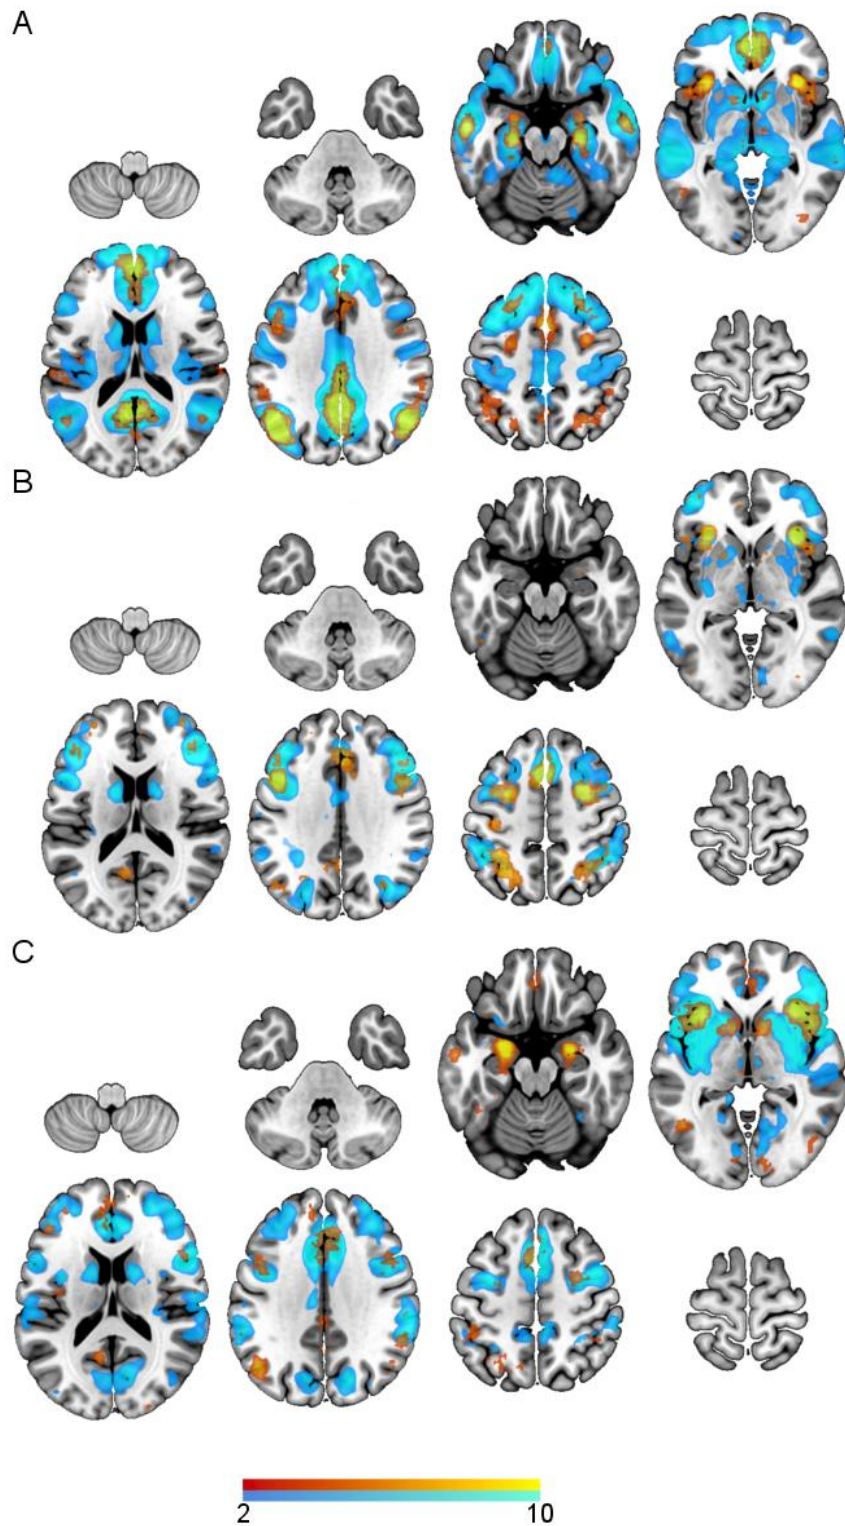

**Supplemental Table 1.** Correlation analyses between kisspeptin's modulation of the Default Mode Network (DMN) connectivity with psychometric outcomes. Two-tailed partial correlations with associations adjusted for visit order as previously described (1). \*\*  $P < 0.01$ .  $n=29$ .

|                        | Correlation Coefficient (r), <i>P</i> Value |
|------------------------|---------------------------------------------|
| BAS Drive              | -0.489, 0.008**                             |
| BAS Fun                | -0.176, 0.368                               |
| BAS Reward             | -0.079, 0.691                               |
| BIS                    | 0.109, 0.582                                |
| SADI Evaluative        | 0.002, 0.993                                |
| SADI Negative          | -0.499, 0.006**                             |
| SADI Physiological     | -0.112, 0.570                               |
| SADI Motivational      | 0.072, 0.716                                |
| Positive Affect Change | -0.072, 0.714                               |
| Negative Affect Change | 0.056, 0.777                                |

**Supplemental Table 2.** Correlation analyses between kisspeptin's modulation of the Default Mode Network (DMN) connectivity with task brain activity in *a priori* limbic and paralimbic brain structures. Two-tailed partial correlations with associations adjusted for visit order as previously described (1). \*\*  $P < 0.01$ .  $n=29$ .

|                      |          | Correlation Coefficient (r), P Value |
|----------------------|----------|--------------------------------------|
| Amygdala             | Sexual   | 0.273, 0.151                         |
|                      | Bonding  | -0.181, 0.347                        |
|                      | Negative | 0.253, 0.185                         |
|                      | Neutral  | 0.106, 0.585                         |
| Hippocampus          | Sexual   | 0.275, 0.148                         |
|                      | Bonding  | 0.041, 0.832                         |
|                      | Negative | 0.279, 0.142                         |
|                      | Neutral  | 0.346, 0.065                         |
| Thalamus             | Sexual   | 0.313, 0.097                         |
|                      | Bonding  | -0.115, 0.552                        |
|                      | Negative | 0.232, 0.224                         |
|                      | Neutral  | 0.219, 0.253                         |
| Putamen              | Sexual   | 0.406, 0.028                         |
|                      | Bonding  | -0.063, 0.747                        |
|                      | Negative | 0.230, 0.229                         |
|                      | Neutral  | 0.256, 0.179                         |
| Globus Pallidus      | Sexual   | 0.500, 0.005**                       |
|                      | Bonding  | -0.094, 0.628                        |
|                      | Negative | 0.185, 0.335                         |
|                      | Neutral  | 0.145, 0.451                         |
| Anterior Cingulate   | Sexual   | 0.338, 0.072                         |
|                      | Bonding  | -0.206, 0.283                        |
|                      | Negative | 0.139, 0.473                         |
|                      | Neutral  | 0.113, 0.560                         |
| Posterior Cingulate  | Sexual   | 0.475, 0.009**                       |
|                      | Bonding  | -0.239, 0.211                        |
|                      | Negative | 0.271, 0.154                         |
|                      | Neutral  | 0.139, 0.473                         |
| Medial Frontal Gyrus | Sexual   | 0.298, 0.115                         |
|                      | Bonding  | -0.094, 0.628                        |
|                      | Negative | 0.185, 0.335                         |
|                      | Neutral  | 0.062, 0.747                         |
| Nucleus Accumbens    | Sexual   | 0.130, 0.500                         |
|                      | Bonding  | -0.220, 0.251                        |
|                      | Negative | -0.039, 0.841                        |
|                      | Neutral  | -0.008, 0.967                        |
| Caudate              | Sexual   | 0.149, 0.441                         |
|                      | Bonding  | -0.354, 0.059                        |
|                      | Negative | -0.051, 0.794                        |
|                      | Neutral  | -0.057, 0.771                        |

**Supplemental Table 3.** Correlation analyses between kisspeptin's modulation of the Executive Control Network (ECN) connectivity with psychometric outcomes. Two-tailed partial correlations with associations adjusted for visit order as previously described (1). \*\*  $P < 0.01$ .  $n=29$ .

|                        | Correlation Coefficient (r), <i>P</i> Value |
|------------------------|---------------------------------------------|
| BAS Drive              | 0.263, 0.177                                |
| BAS Fun                | 0.032, 0.870                                |
| BAS Reward             | 0.277, 0.153                                |
| BIS                    | -0.005, 0.980                               |
| SADI Evaluative        | 0.148, 0.453                                |
| SADI Negative          | -0.026, 0.897                               |
| SADI Physiological     | 0.047, 0.812                                |
| SADI Motivational      | 0.015, 0.938                                |
| Positive Affect Change | -0.085, 0.668                               |
| Negative Affect Change | 0.031, 0.877                                |

**Supplemental Table 4.** Correlation analyses between kisspeptin's modulation of the Executive Control Network (ECN) connectivity with task brain activity in *a priori* limbic and paralimbic brain structures. Two-tailed partial correlations with associations adjusted for visit order as previously described (1). \*\*  $P < 0.01$ .  $n=29$ .

|                      |          | Correlation Coefficient (r), P Value |
|----------------------|----------|--------------------------------------|
| Amygdala             | Sexual   | -0.224, 0.242                        |
|                      | Bonding  | -0.310, 0.102                        |
|                      | Negative | -0.198, 0.302                        |
|                      | Neutral  | -0.098, 0.614                        |
| Hippocampus          | Sexual   | -0.304, 0.109                        |
|                      | Bonding  | -0.398, 0.032                        |
|                      | Negative | -0.294, 0.121                        |
|                      | Neutral  | -0.132, 0.495                        |
| Thalamus             | Sexual   | -0.286, 0.133                        |
|                      | Bonding  | -0.325, 0.085                        |
|                      | Negative | -0.339, 0.072                        |
|                      | Neutral  | -0.204, 0.289                        |
| Putamen              | Sexual   | -0.229, 0.231                        |
|                      | Bonding  | -0.335, 0.076                        |
|                      | Negative | -0.306, 0.106                        |
|                      | Neutral  | -0.355, 0.058                        |
| Globus Pallidus      | Sexual   | -0.271, 0.156                        |
|                      | Bonding  | -0.115, 0.552                        |
|                      | Negative | -0.186, 0.334                        |
|                      | Neutral  | -0.119, 0.538                        |
| Anterior Cingulate   | Sexual   | -0.155, 0.422                        |
|                      | Bonding  | -0.067, 0.730                        |
|                      | Negative | -0.166, 0.390                        |
|                      | Neutral  | 0.008, 0.966                         |
| Posterior Cingulate  | Sexual   | -0.230, 0.231                        |
|                      | Bonding  | -0.170, 0.378                        |
|                      | Negative | -0.001, 0.996                        |
|                      | Neutral  | -0.166, 0.390                        |
| Medial Frontal Gyrus | Sexual   | -0.233, 0.224                        |
|                      | Bonding  | -0.284, 0.136                        |
|                      | Negative | -0.346, 0.066                        |
|                      | Neutral  | -0.196, 0.307                        |
| Nucleus Accumbens    | Sexual   | -0.104, 0.592                        |
|                      | Bonding  | -0.165, 0.393                        |
|                      | Negative | -0.056, 0.773                        |
|                      | Neutral  | 0.093, 0.631                         |
| Caudate              | Sexual   | -0.295, 0.121                        |
|                      | Bonding  | -0.334, 0.077                        |
|                      | Negative | -0.318, 0.093                        |
|                      | Neutral  | -0.255, 0.182                        |

**Supplemental Table 5.** Correlation analyses between kisspeptin's modulation of the Salience Network (SN) connectivity with psychometric outcomes. Two-tailed partial correlations with associations adjusted for visit order as previously described (1). \*\*  $P < 0.01$ .  $n=29$ .

|                        | Correlation Coefficient (r), <i>P</i> Value |
|------------------------|---------------------------------------------|
| BAS Drive              | -0.264, 0.173                               |
| BAS Fun                | 0.020, 0.918                                |
| BAS Reward             | 0.040, 0.841                                |
| BIS                    | -0.143, 0.467                               |
| SADI Evaluative        | 0.191, 0.328                                |
| SADI Negative          | -0.565, 0.002**                             |
| SADI Physiological     | 0.073, 0.712                                |
| SADI Motivational      | 0.267, 0.168                                |
| Positive Affect Change | 0.109, 0.582                                |
| Negative Affect Change | 0.119, 0.545                                |

**Supplemental Table 6.** Correlation analyses between kisspeptin's modulation of the Salience Network (SN) connectivity with task brain activity in *a priori* limbic and paralimbic brain structures. Two-tailed partial correlations with associations adjusted for visit order as previously described (1). \*\*  $P < 0.01$ .  $n=29$ .

|                      |          | Correlation Coefficient (r), P Value |
|----------------------|----------|--------------------------------------|
| Amygdala             | Sexual   | 0.087, 0.654                         |
|                      | Bonding  | -0.063, 0.747                        |
|                      | Negative | 0.107, 0.579                         |
|                      | Neutral  | -0.018, 0.926                        |
| Hippocampus          | Sexual   | 0.148, 0.442                         |
|                      | Bonding  | 0.124, 0.522                         |
|                      | Negative | 0.196, 0.307                         |
|                      | Neutral  | 0.187, 0.332                         |
| Thalamus             | Sexual   | 0.140, 0.469                         |
|                      | Bonding  | -0.137, 0.479                        |
|                      | Negative | 0.072, 0.711                         |
|                      | Neutral  | 0.008, 0.967                         |
| Putamen              | Sexual   | 0.221, 0.248                         |
|                      | Bonding  | -0.023, 0.904                        |
|                      | Negative | 0.114, 0.555                         |
|                      | Neutral  | 0.138, 0.474                         |
| Globus Pallidus      | Sexual   | 0.291, 0.124                         |
|                      | Bonding  | -0.056, 0.774                        |
|                      | Negative | 0.030, 0.878                         |
|                      | Neutral  | 0.003, 0.987                         |
| Anterior Cingulate   | Sexual   | 0.164, 0.394                         |
|                      | Bonding  | -0.145, 0.453                        |
|                      | Negative | 0.158, 0.413                         |
|                      | Neutral  | 0.024, 0.901                         |
| Posterior Cingulate  | Sexual   | 0.301, 0.112                         |
|                      | Bonding  | -0.063, 0.744                        |
|                      | Negative | 0.237, 0.215                         |
|                      | Neutral  | 0.158, 0.413                         |
| Medial Frontal Gyrus | Sexual   | 0.024, 0.900                         |
|                      | Bonding  | -0.207, 0.281                        |
|                      | Negative | -0.059, 0.761                        |
|                      | Neutral  | -0.178, 0.354                        |
| Nucleus Accumbens    | Sexual   | -0.107, 0.580                        |
|                      | Bonding  | -0.144, 0.456                        |
|                      | Negative | -0.139, 0.470                        |
|                      | Neutral  | 0.020, 0.918                         |
| Caudate              | Sexual   | -0.079, 0.685                        |
|                      | Bonding  | -0.268, 0.159                        |
|                      | Negative | -0.175, 0.362                        |
|                      | Neutral  | -0.106, 0.583                        |



**Supplemental Table 7.** Correlation analyses between kisspeptin's modulation of hippocampus-globus pallidus connectivity with psychometric outcomes. Two-tailed partial correlations with associations adjusted for visit order as previously described (1). \*\*  $P < 0.01$ .  $n=29$ .

|                        | Correlation Coefficient (r), <i>P</i> Value |
|------------------------|---------------------------------------------|
| BAS Drive              | 0.245, 0.207                                |
| BAS Fun                | -0.027, 0.892                               |
| BAS Reward             | 0.207, 0.289                                |
| BIS                    | 0.307, 0.111                                |
| SADI Evaluative        | -0.226, 0.246                               |
| SADI Negative          | -0.313, 0.103                               |
| SADI Physiological     | -0.286, 0.138                               |
| SADI Motivational      | -0.055, 0.782                               |
| Positive Affect Change | -0.019, 0.922                               |
| Negative Affect Change | 0.090, 0.647                                |

**Supplemental Table 8.** Correlation analyses between kisspeptin's modulation of hippocampus-globus pallidus connectivity with task brain activity in *a priori* limbic and paralimbic brain structures. Two-tailed partial correlations with associations adjusted for visit order as previously described (1). \*\*  $P < 0.01$ .  $n=29$ .

|                      |          | Correlation Coefficient (r), P Value |
|----------------------|----------|--------------------------------------|
| Amygdala             | Sexual   | 0.134, 0.487                         |
|                      | Bonding  | 0.164, 0.396                         |
|                      | Negative | 0.353, 0.059                         |
|                      | Neutral  | 0.034, 0.862                         |
| Hippocampus          | Sexual   | 0.131, 0.497                         |
|                      | Bonding  | 0.175, 0.362                         |
|                      | Negative | 0.423, 0.021                         |
|                      | Neutral  | 0.158, 0.411                         |
| Thalamus             | Sexual   | 0.159, 0.409                         |
|                      | Bonding  | 0.144, 0.456                         |
|                      | Negative | 0.520, 0.004**                       |
|                      | Neutral  | 0.290, 0.125                         |
| Putamen              | Sexual   | 0.293, 0.122                         |
|                      | Bonding  | 0.269, 0.158                         |
|                      | Negative | 0.485, 0.007**                       |
|                      | Neutral  | 0.360, 0.054                         |
| Globus Pallidus      | Sexual   | 0.209, 0.276                         |
|                      | Bonding  | 0.106, 0.584                         |
|                      | Negative | 0.462, 0.011                         |
|                      | Neutral  | 0.227, 0.236                         |
| Anterior Cingulate   | Sexual   | 0.045, 0.817                         |
|                      | Bonding  | -0.134, 0.487                        |
|                      | Negative | 0.291, 0.125                         |
|                      | Neutral  | 0.058, 0.765                         |
| Posterior Cingulate  | Sexual   | 0.023, 0.906                         |
|                      | Bonding  | -0.060, 0.759                        |
|                      | Negative | 0.484, 0.007**                       |
|                      | Neutral  | 0.086, 0.658                         |
| Medial Frontal Gyrus | Sexual   | 0.087, 0.653                         |
|                      | Bonding  | 0.054, 0.783                         |
|                      | Negative | 0.486, 0.007**                       |
|                      | Neutral  | 0.207, 0.279                         |
| Nucleus Accumbens    | Sexual   | -0.026, 0.892                        |
|                      | Bonding  | -0.096, 0.622                        |
|                      | Negative | 0.475, 0.009**                       |
|                      | Neutral  | 0.325, 0.084                         |
| Caudate              | Sexual   | 0.243, 0.203                         |
|                      | Bonding  | 0.109, 0.575                         |
|                      | Negative | 0.508, 0.005**                       |
|                      | Neutral  | 0.266, 0.162                         |

*Reference:*

1. Comninou AN, Wall MB, Demetriou L, Shah AJ, Clarke SA, Narayanaswamy S, Nesbitt A, Izzi-Engbeaya C, Prague JK, Abbara A, et al. Kisspeptin modulates sexual and emotional brain processing in humans. *The Journal of Clinical Investigation*. 2017;127(2):709-19.
